# Supplementary material for: Pulse Oximetry as an Aid to Rule Out Pneumonia among Patients with a Lower Respiratory Tract Infection in Primary Care
Source: MDPI journal article supplement (doi:10.3390/antibiotics12030496), 2023-03-02
Supplement: s1 [file s1]

**Supplementary Table S1.** Characteristics of the patients included in this ancillary study compared to those who were not included (because of the absence of recorded chest X-ray or vital signs) from the original cluster randomized trial.

|                                       | All<br>N=469 | Not<br>included<br>N=362<br>(77%) | Included<br>N=107<br>(23%) | P        |
|---------------------------------------|--------------|-----------------------------------|----------------------------|----------|
| <b>Demographics and comorbidities</b> |              |                                   |                            |          |
| Female                                | 278 (59)     | 213 (59)                          | 65 (61)                    | 0.810    |
| Age $\geq$ 65 years                   | 126 (27)     | 92 (25)                           | 34 (32)                    | 0.238    |
| Active smoker                         | 101 (22)     | 77 (21)                           | 24 (22)                    | 0.913    |
| Any comorbidity                       | 116 (26)     | 88 (25)                           | 28 (27)                    | 0.864    |
| Chronic obstructive pulmonary disease | 30 (6.4)     | 22 (6.1)                          | 8 (7.5)                    | 0.654    |
| Asthma                                | 70 (15)      | 51 (14)                           | 19 (18)                    | 0.448    |
| Other comorbidity*                    | 29 (6.4)     | 24 (6.8)                          | 5 (4.8)                    | 0.647    |
| <b>Symptoms and signs</b>             |              |                                   |                            |          |
| Sputum production                     | 322 (69)     | 248 (69)                          | 74 (70)                    | 0.981    |
| History of fever                      | 317 (68)     | 243 (67)                          | 74 (69)                    | 0.782    |
| History of dyspnoea                   | 302 (65)     | 229 (64)                          | 73 (69)                    | 0.397    |
| History of chest pain                 | 197 (43)     | 151 (42)                          | 46 (43)                    | 1.000    |
| Heart rate $>$ 100/minute             | 66 (14)      | 49 (14)                           | 17 (16)                    | 0.663    |
| Temperature $\geq$ 37.8°C             | 75 (16)      | 52 (14)                           | 23 (22)                    | 0.111    |
| Oxygen saturation $<$ 95%             | 93 (23)      | 64 (22)                           | 29 (27)                    | 0.300    |
| Respiratory rate $\geq$ 24/minute     | 77 (17)      | 52 (15)                           | 25 (23)                    | 0.043    |
| Hypotension**                         | 24 (5.2)     | 16 (4.5)                          | 8 (7.5)                    | 0.219    |
| CRB-65 $\geq$ 1 point                 | 137 (30)     | 98 (28)                           | 39 (36)                    | 0.095    |
| Abnormal lung auscultation            | 220 (47)     | 145 (41)                          | 75 (70)                    | $<0.001$ |

Values are n (%).

\*Other comorbidity: heart failure (4/469, 0.85%), diabetes (21/469, 4.5%), active malignancy (5/469, 1.1%), chronic kidney disease (0/469, 0.0%) or human immunodeficiency virus infection (0/469, 0.0%).

\*\*Hypotension: systolic blood pressure  $\leq$  90 mmHg or diastolic blood pressure  $\leq$  60 mmHg
